# Supplementary material for: Testosterone-derived estradiol production by male endothelium is robust and dependent on p450 aromatase via estrogen receptor alpha
Source: PubMed Central journal article supplement (PMC3667361; doi:10.1186/2193-1801-2-214), 2013-05-09

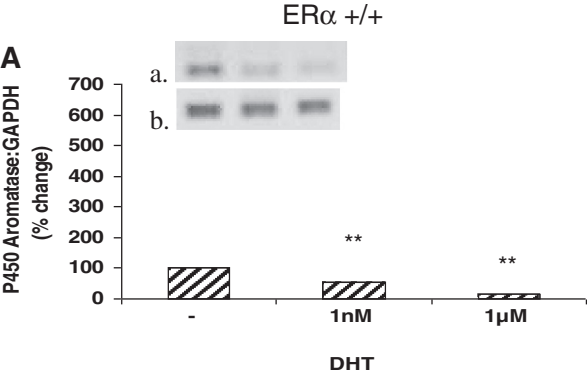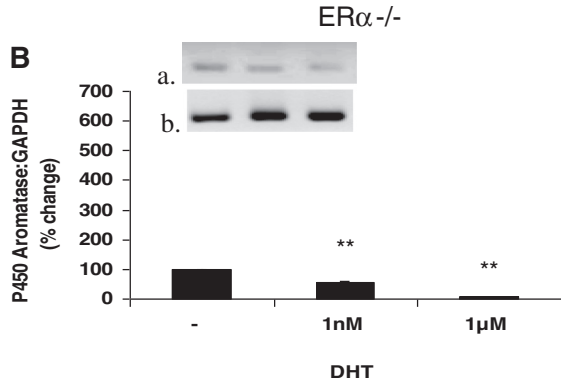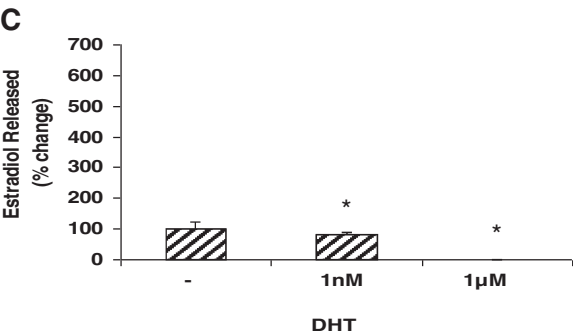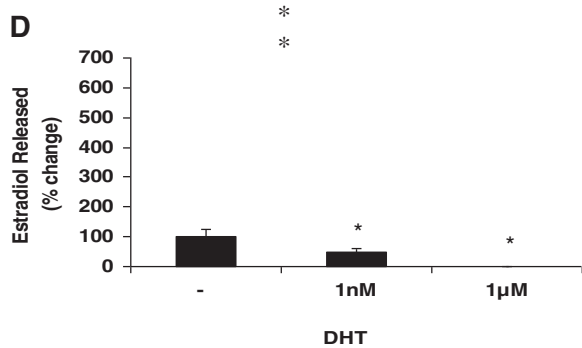

Supplement: 40064_2013_289_MOESM2_ESM.pdf [file 40064_2013_289_MOESM2_ESM.pdf]
